# Supplementary material
Source: PubMed Central journal article supplement (PMC9068356)

**ONLINE SUPPLEMENTARY CONTENT**

**Table S1 - Strength of recommendations and levels of evidence according to the GRADE methodology<sup>11</sup>, with their significance regarding quality of evidence\***

| Grade of recommendation (1-2)<br>Level of evidence (A-B-C) | Benefit vs risk<br>and burdens                             | Methodological quality<br>of supporting evidence                  | Significance                                               |
|------------------------------------------------------------|------------------------------------------------------------|-------------------------------------------------------------------|------------------------------------------------------------|
| <b>1A</b>                                                  | Benefits clearly outweigh risk and burdens                 | Data arising from numerous RCT or meta-analyses of RCT            | Strong recommendation, high quality of evidence            |
| <b>1B</b>                                                  | Benefits clearly outweigh risk and burdens                 | Data arising from RCT with important limitations or large non-RCT | Strong recommendation, moderate quality of evidence        |
| <b>1C</b>                                                  | Benefits clearly outweigh risk and burdens                 | Data arising from small non-RCT, case-series or registries        | Strong recommendation, low or very low quality of evidence |
| <b>2A</b>                                                  | Benefits closely balanced with risks and burden            | Data arising from numerous RCT or meta-analyses of RCT            | Weak recommendation, high quality of evidence              |
| <b>2B</b>                                                  | Benefits closely balanced with risks and burden            | Data arising from RCT with important limitations or large non-RCT | Weak recommendation, moderate quality of evidence          |
| <b>2C</b>                                                  | Uncertainty in the estimates of benefits, risks and burden | Data arising from small non-RCT, case-series or registries        | Weak recommendation, low or very low quality of evidence   |

\*Definitions of quality of evidence - *High quality*: Further research is very unlikely to change our confidence in the estimate of effect. *Moderate quality*: Further research is likely to have an important impact on our confidence in the estimate of effect and may change the estimate. *Low quality*: Further research is very likely to have an important impact on our confidence in the estimate of effect and is likely to change the estimate. *Very low quality*: Any estimate of effect is very uncertain.

RCT: randomised controlled trials.

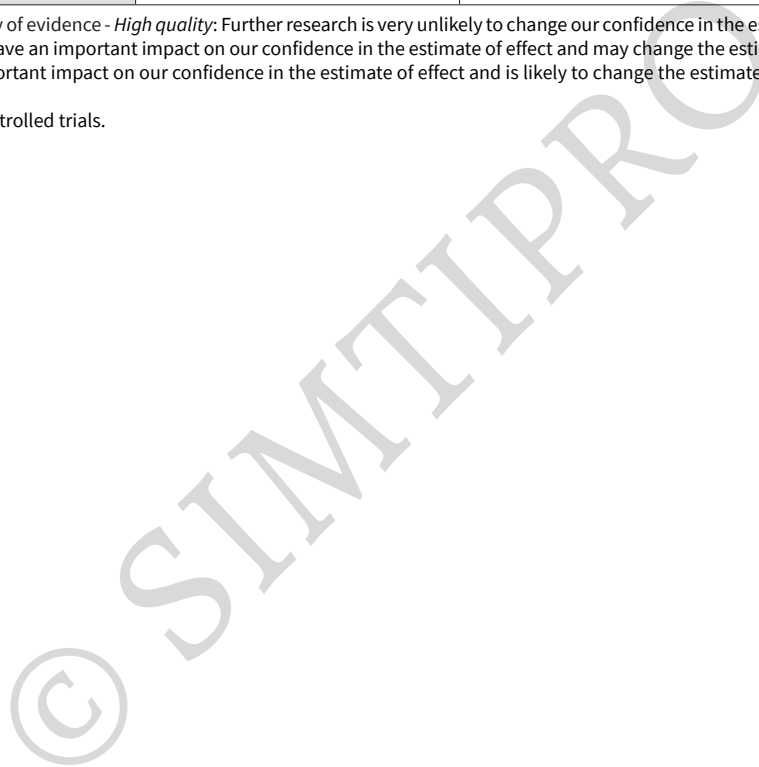

Supplement: BLT-20-245_Online_Supplementary_Content.pdf [file BLT-20-245_Online_Supplementary_Content.pdf]
